# Supplementary material for: Development of a minimal PBPK-QSP modeling platform for LNP-mRNA based therapeutics to study tissue disposition and protein expression dynamics
Source: Frontiers journal article supplement (doi:10.3389/fnano.2024.1330406), 2024-01-31
Supplement: Data_Sheet_2.xlsx [file Data_Sheet_2.xlsx]

## Sheet: Equations
ODEs:
d(M_LNP_Venous)/dt = 1/Venous*(-Reaction_1 - Reaction_12 + Reaction_20 + Reaction_23 + Reaction_25)
d(M_LNPp_Venous)/dt = 1/Venous*(-Reaction_83 + Reaction_98 - Reaction_99 + Reaction_109 + Reaction_113 - Reaction_102 + Reaction_137)
d(M_LNP_Venous_mac)/dt = 1/Venous_mac*(Reaction_1 - Reaction_26 - Reaction_34 - Reaction_136)
d(M_mRNA_Venous)/dt = 1/Venous_mac*(Reaction_26 - Reaction_41 + Reaction_84)
d(M_UGT_Venous)/dt = 1/Venous_mac*(Reaction_50 - Reaction_58)
d(M_LNPp_Venous_mac)/dt = 1/Venous_mac*(Reaction_83 - Reaction_84 - Reaction_119)
d(M_LNPp_endo_Venous)/dt = 1/Venous_mac*(Reaction_136 - Reaction_137)
d(M_LNP_Lung_vascular)/dt = 1/Lung_vascular*(-Reaction_2 + Reaction_12 - Reaction_14)
d(M_LNPp_Lung_vascular)/dt = 1/Lung_vascular*(Reaction_99 - Reaction_100 - Reaction_101 - Reaction_126)
d(M_LNP_Lung_interstitial)/dt = 1/Lung_interstitial*(Reaction_2 - Reaction_3 - Reaction_13)
d(M_LNPp_Lung_interstitial)/dt = 1/Lung_interstitial*(-Reaction_86 + Reaction_100 - Reaction_116 + Reaction_139)
d(M_LNP_Lung_mac)/dt = 1/Lung_mac*(Reaction_3 - Reaction_27 - Reaction_35 - Reaction_138)
d(M_mRNA_Lung)/dt = 1/Lung_mac*(Reaction_27 - Reaction_42 + Reaction_87)
d(M_UGT_Lung)/dt = 1/Lung_mac*(Reaction_51 - Reaction_59)
d(M_LNPp_Lung_mac)/dt = 1/Lung_mac*(Reaction_86 - Reaction_87 - Reaction_120)
d(M_LNPp_endo_Lung)/dt = 1/Lung_mac*(Reaction_138 - Reaction_139)
d(M_LNP_Arterial)/dt = 1/Arterial*(-Reaction_4 + Reaction_14 - Reaction_15 - Reaction_17 - Reaction_21)
d(M_LNPp_Arterial)/dt = 1/Arterial*(-Reaction_89 + Reaction_101 - Reaction_103 - Reaction_110 - Reaction_112 - Reaction_127 + Reaction_141)
d(M_LNP_Arterial_mac)/dt = 1/Arterial_mac*(Reaction_4 - Reaction_28 - Reaction_36 - Reaction_140)
d(M_mRNA_Arterial)/dt = 1/Arterial_mac*(Reaction_28 - Reaction_43 + Reaction_90)
d(M_UGT_Arterial)/dt = 1/Arterial_mac*(Reaction_52 - Reaction_60)
d(M_LNPp_Arterial_mac)/dt = 1/Arterial_mac*(Reaction_89 - Reaction_90 - Reaction_121)
d(M_LNPp_endo_Arterial)/dt = 1/Arterial_mac*(Reaction_140 - Reaction_141)
d(M_LNP_PO_vascular)/dt = 1/PO_vascular*(-Reaction_5 + Reaction_15 - Reaction_19)
d(M_LNPp_PO_vascular)/dt = 1/PO_vascular*(Reaction_103 - Reaction_104 - Reaction_117 - Reaction_128)
d(M_LNP_PO_interstitial)/dt = 1/PO_Interstitial*(Reaction_5 - Reaction_6 - Reaction_16)
d(M_LNPp_PO_interstitial)/dt = 1/PO_Interstitial*(-Reaction_92 - Reaction_114 + Reaction_117 + Reaction_143)
d(M_LNP_PO_mac)/dt = 1/PO_mac*(Reaction_6 - Reaction_29 - Reaction_37 - Reaction_142)
d(M_mRNA_PO)/dt = 1/PO_mac*(Reaction_29 - Reaction_44 + Reaction_93)
d(M_UGT_PO)/dt = 1/PO_mac*(Reaction_53 - Reaction_61)
d(M_LNPp_PO_mac)/dt = 1/PO_mac*(Reaction_92 - Reaction_93 - Reaction_123)
d(M_LNPp_endo_PO)/dt = 1/PO_mac*(Reaction_142 - Reaction_143)
d(M_LNP_Liver_vascular)/dt = 1/Liver_vascular*(-Reaction_7 - Reaction_8 + Reaction_17 + Reaction_19 - Reaction_20)
d(M_LNPp_Liver_vascular)/dt = 1/Liver_vascular*(Reaction_104 - Reaction_105 - Reaction_106 - Reaction_109 + Reaction_110 - Reaction_129 + Reaction_135)
d(M_LNP_Liver_Kupffer)/dt = 1/Liver_Kupffer*(Reaction_8 - Reaction_32 - Reaction_47 - Reaction_134)
d(M_mRNA_Kupffer)/dt = 1/Liver_Kupffer*(Reaction_32 - Reaction_48 + Reaction_107)
d(M_UGT_Kupffer)/dt = 1/Liver_Kupffer*(Reaction_55 - Reaction_64)
d(M_LNPp_Liver_Kupffer)/dt = 1/Liver_Kupffer*(Reaction_106 - Reaction_107 - Reaction_124)
d(M_LNPp_endo_Kupffer)/dt = 1/Liver_Kupffer*(Reaction_134 - Reaction_135)
d(M_LNP_Liver_interstitial)/dt = 1/Liver_interstitial*(Reaction_7 - Reaction_9 - Reaction_18)
d(M_LNPp_Liver_interstitial)/dt = 1/Liver_interstitial*(-Reaction_77 - Reaction_97 + Reaction_105 + Reaction_132)
d(M_LNP_Liver_Hep)/dt = 1/Liver_Hep*(Reaction_9 - Reaction_31 - Reaction_39 - Reaction_76)
d(M_mRNA_Hep)/dt = 1/Liver_Hep*(Reaction_31 - Reaction_46 + Reaction_78)
d(M_UGT_Hep)/dt = 1/Liver_Hep*(Reaction_56 - Reaction_63 - Reaction_66 + Reaction_67 - Reaction_68 + Reaction_69)
d(M_Bil)/dt = 1/Liver_Hep*(-Reaction_66 - Reaction_70 + Reaction_73 + Reaction_74)
d(M_UGTbBil)/dt = 1/Liver_Hep*(Reaction_66 - Reaction_67 - Reaction_74)
d(M_BilMG)/dt = 1/Liver_Hep*(Reaction_67 - Reaction_68 - Reaction_71 + Reaction_75)
d(M_UGTbBilMG)/dt = 1/Liver_Hep*(Reaction_68 - Reaction_69 - Reaction_75)
d(M_BilDG)/dt = 1/Liver_Hep*(Reaction_69 - Reaction_72)
d(M_LNPp_Hep)/dt = 1/Liver_Hep*(Reaction_77 - Reaction_78 - Reaction_118)
d(M_LNPp_endo_Hep)/dt = 1/Liver_Hep*(Reaction_76 - Reaction_132)
d(M_LNP_OO_vascular)/dt = 1/OO_vascular*(-Reaction_10 + Reaction_21 - Reaction_23)
d(M_LNPp_OO_vascular)/dt = 1/OO_vascular*(-Reaction_111 + Reaction_112 - Reaction_113 - Reaction_130)
d(M_LNP_OO_interstitial)/dt = 1/OO_interstitial*(Reaction_10 - Reaction_11 - Reaction_22)
d(M_LNPp_OO_interstitial)/dt = 1/OO_interstitial*(-Reaction_95 + Reaction_111 - Reaction_115 + Reaction_145)
d(M_LNP_OO_mac)/dt = 1/OO_mac*(Reaction_11 - Reaction_30 - Reaction_38 - Reaction_144)
d(M_mRNA_OO)/dt = 1/OO_mac*(Reaction_30 - Reaction_45 + Reaction_96)
d(M_UGT_OO)/dt = 1/OO_mac*(Reaction_54 - Reaction_62)
d(M_LNPp_OO_mac)/dt = 1/OO_mac*(Reaction_95 - Reaction_96 - Reaction_122)
d(M_LNPp_endo_OO)/dt = 1/OO_mac*(Reaction_144 - Reaction_145)
d(M_LNP_LN)/dt = 1/LN*(Reaction_13 + Reaction_16 + Reaction_18 + Reaction_22 - Reaction_24 - Reaction_25)
d(M_LNPp_LN)/dt = 1/LN*(-Reaction_80 + Reaction_97 - Reaction_98 + Reaction_114 + Reaction_115 + Reaction_116 - Reaction_131 + Reaction_147)
d(M_LNP_LN_mac)/dt = 1/LN_mac*(Reaction_24 - Reaction_33 - Reaction_40 - Reaction_146)
d(M_mRNA_LN)/dt = 1/LN_mac*(Reaction_33 - Reaction_49 + Reaction_81)
d(M_UGT_LN)/dt = 1/LN_mac*(Reaction_57 - Reaction_65)
d(M_LNPp_LN_mac)/dt = 1/LN_mac*(Reaction_80 - Reaction_81 - Reaction_125)
d(M_LNPp_endo_LN)/dt = 1/LN_mac*(Reaction_146 - Reaction_147)
d(UGT_AUC)/dt = 1/Output*(Reaction_79)
d(mRNA_AUC)/dt = 1/Output*(Reaction_82)
Fluxes:
Reaction_1 = kup*Vol_Venous_mac*C_LNP_Venous
Reaction_2 = Jin_Lung*C_LNP_Lung_vascular
Reaction_3 = kup*Vol_Lung_mac*C_LNP_Lung_interstitial
Reaction_4 = kup*Vol_Arterial_mac*C_LNP_Arterial
Reaction_5 = Jin_PO*C_LNP_PO_vascular
Reaction_6 = kup*Vol_PO_mac*C_LNP_PO_interstitial
Reaction_7 = Jin_Liver*C_LNP_Liver_vascular
Reaction_8 = kup_Kupffer*Vol_Liver_Kupffer*C_LNP_Liver_vascular
Reaction_9 = kup_Liver*Vol_Liver_Hep*C_LNP_Liver_interstitial
Reaction_10 = Jin_OO*C_LNP_OO_vascular
Reaction_11 = kup*Vol_OO_mac*C_LNP_OO_interstitial
Reaction_12 = Q_Lung*C_LNP_Venous
Reaction_13 = L_Lung*(1-sigma_i)*C_LNP_Lung_interstitial
Reaction_14 = (Q_Lung-L_Lung)*C_LNP_Lung_vascular
Reaction_15 = Q_PO*C_LNP_Arterial
Reaction_16 = L_PO*(1-sigma_i)*C_LNP_PO_interstitial
Reaction_17 = Q_Liver*C_LNP_Arterial
Reaction_18 = L_Liver*(1-sigma_i)*C_LNP_Liver_interstitial
Reaction_19 = (Q_PO-L_PO)*C_LNP_PO_vascular
Reaction_20 = (Q_Liver-L_Liver+Q_PO-L_PO)*C_LNP_Liver_vascular
Reaction_21 = Q_OO*C_LNP_Arterial
Reaction_22 = L_OO*(1-sigma_i)*C_LNP_OO_interstitial
Reaction_23 = (Q_OO-L_OO)*C_LNP_OO_vascular
Reaction_24 = kup*Vol_LN_mac*C_LNP_LN
Reaction_25 = L_LN*C_LNP_LN
Reaction_26 = kescape*M_LNP_Venous_mac
Reaction_27 = kescape*M_LNP_Lung_mac
Reaction_28 = kescape*M_LNP_Arterial_mac
Reaction_29 = kescape*M_LNP_PO_mac
Reaction_30 = kescape*M_LNP_OO_mac
Reaction_31 = kescape*M_LNP_Liver_Hep
Reaction_32 = kescape*M_LNP_Liver_Kupffer
Reaction_33 = kescape*M_LNP_LN_mac
Reaction_34 = kdeg_Endo*M_LNP_Venous_mac
Reaction_35 = kdeg_Endo*M_LNP_Lung_mac
Reaction_36 = kdeg_Endo*M_LNP_Arterial_mac
Reaction_37 = kdeg_Endo*M_LNP_PO_mac
Reaction_38 = kdeg_Endo*M_LNP_OO_mac
Reaction_39 = kdeg_Endo*M_LNP_Liver_Hep
Reaction_40 = kdeg_Endo*M_LNP_LN_mac
Reaction_41 = kdeg_mRNA_Venous*M_mRNA_Venous
Reaction_42 = kdeg_mRNA_Lung*M_mRNA_Lung
Reaction_43 = kdeg_mRNA_Arterial*M_mRNA_Arterial
Reaction_44 = kdeg_mRNA_PO*M_mRNA_PO
Reaction_45 = kdeg_mRNA_OO*M_mRNA_OO
Reaction_46 = kdeg_mRNA_Hep*M_mRNA_Hep
Reaction_47 = kdeg_Endo*M_LNP_Liver_Kupffer
Reaction_48 = kdeg_mRNA_Kupffer*M_mRNA_Kupffer
Reaction_49 = kdeg_mRNA_LN*M_mRNA_LN
Reaction_50 = ktranslate*M_mRNA_Venous
Reaction_51 = ktranslate*M_mRNA_Lung
Reaction_52 = ktranslate*M_mRNA_Arterial
Reaction_53 = ktranslate*M_mRNA_PO
Reaction_54 = ktranslate*M_mRNA_OO
Reaction_55 = ktranslate*M_mRNA_Kupffer
Reaction_56 = ktranslate*M_mRNA_Hep
Reaction_57 = ktranslate*M_mRNA_LN
Reaction_58 = kdeg_UGT*M_UGT_Venous
Reaction_59 = kdeg_UGT*M_UGT_Lung
Reaction_60 = kdeg_UGT*M_UGT_Arterial
Reaction_61 = kdeg_UGT*M_UGT_PO
Reaction_62 = kdeg_UGT*M_UGT_OO
Reaction_63 = kdeg_UGT*M_UGT_Hep
Reaction_64 = kdeg_UGT*M_UGT_Kupffer
Reaction_65 = kdeg_UGT*M_UGT_LN
Reaction_66 = kon*C_Bil*C_UGT_Hep*Vol_Liver_Hep-koff*M_UGTbBil
Reaction_67 = kcat*M_UGTbBil
Reaction_68 = kon*C_BilMG*C_UGT_Hep*Vol_Liver_Hep-koff*M_UGTbBilMG
Reaction_69 = kcat*M_UGTbBilMG
Reaction_70 = kdeg_Bil_slow*M_Bil
Reaction_71 = kdeg_Bil_fast*M_BilMG
Reaction_72 = kdeg_Bil_fast*M_BilDG
Reaction_73 = ksyn
Reaction_74 = kdeg_UGT*M_UGTbBil
Reaction_75 = kdeg_UGT*M_UGTbBilMG
Reaction_77 = kupp*Vol_Liver_Hep*C_LNPp_Liver_interstitial
Reaction_78 = kescape*M_LNPp_Hep
Reaction_80 = kupp*Vol_LN_mac*C_LNPp_LN
Reaction_81 = kescape*M_LNPp_LN_mac
Reaction_83 = kupp*Vol_Venous_mac*C_LNPp_Venous
Reaction_84 = kescape*M_LNPp_Venous_mac
Reaction_86 = kupp*Vol_Lung_mac*C_LNPp_Lung_interstitial
Reaction_87 = kescape*M_LNPp_Lung_mac
Reaction_89 = kupp*Vol_Arterial_mac*C_LNPp_Arterial
Reaction_90 = kescape*M_LNPp_Arterial_mac
Reaction_92 = kupp*Vol_PO_mac*C_LNPp_PO_interstitial
Reaction_93 = kescape*M_LNPp_PO_mac
Reaction_95 = kupp*Vol_OO_mac*C_LNPp_OO_interstitial
Reaction_96 = kescape*M_LNPp_OO_mac
Reaction_97 = L_Liver*(1-sigma_i)*C_LNPp_Liver_interstitial
Reaction_98 = L_LN*C_LNPp_LN
Reaction_99 = Q_Lung*C_LNPp_Venous
Reaction_100 = Jinp*C_LNPp_Lung_vascular
Reaction_101 = (Q_Lung-L_Lung)*C_LNPp_Lung_vascular
Reaction_103 = Q_PO*C_LNPp_Arterial
Reaction_104 = (Q_PO-L_PO)*C_LNPp_PO_vascular
Reaction_105 = Jinp_Liver*C_LNPp_Liver_vascular
Reaction_106 = kupp*Vol_Liver_Kupffer*C_LNPp_Liver_vascular
Reaction_107 = kescape*M_LNPp_Liver_Kupffer
Reaction_109 = (Q_Liver-L_Liver+Q_PO-L_PO)*C_LNPp_Liver_vascular
Reaction_110 = Q_Liver*C_LNPp_Arterial
Reaction_111 = Jinp*C_LNPp_OO_vascular
Reaction_112 = Q_OO*C_LNPp_Arterial
Reaction_113 = (Q_OO-L_OO)*C_LNPp_OO_vascular
Reaction_114 = L_PO*(1-sigma_i)*C_LNPp_PO_interstitial
Reaction_115 = L_OO*(1-sigma_i)*C_LNPp_OO_interstitial
Reaction_116 = L_Lung*(1-sigma_i)*C_LNPp_Lung_interstitial
Reaction_117 = Jinp*C_LNPp_PO_vascular
Reaction_118 = kdeg_Endop*M_LNPp_Hep
Reaction_119 = kdeg_Endop*M_LNPp_Venous_mac
Reaction_120 = kdeg_Endop*M_LNPp_Lung_mac
Reaction_121 = kdeg_Endop*M_LNPp_Arterial_mac
Reaction_122 = kdeg_Endop*M_LNPp_OO_mac
Reaction_123 = kdeg_Endop*M_LNPp_PO_mac
Reaction_124 = kdeg_Endop*M_LNPp_Liver_Kupffer
Reaction_125 = kdeg_Endop*M_LNPp_LN_mac
Reaction_102 = kdeg_LNPp_sys*M_LNPp_Venous
Reaction_126 = kdeg_LNPp_sys*M_LNPp_Lung_vascular
Reaction_127 = kdeg_LNPp_sys*M_LNPp_Arterial
Reaction_128 = kdeg_LNPp_sys*M_LNPp_PO_vascular
Reaction_129 = kdeg_LNPp_sys*M_LNPp_Liver_vascular
Reaction_130 = kdeg_LNPp_sys*M_LNPp_OO_vascular
Reaction_131 = kdeg_LNPp_sys*M_LNPp_LN
Reaction_76 = krecycle_endo*M_LNP_Liver_Hep
Reaction_132 = krecycle*M_LNPp_endo_Hep
Reaction_134 = krecycle_endo*M_LNP_Liver_Kupffer
Reaction_135 = krecycle*M_LNPp_endo_Kupffer
Reaction_136 = krecycle_endo*M_LNP_Venous_mac
Reaction_137 = krecycle*M_LNPp_endo_Venous
Reaction_138 = krecycle_endo*M_LNP_Lung_mac
Reaction_139 = krecycle*M_LNPp_endo_Lung
Reaction_140 = krecycle_endo*M_LNP_Arterial_mac
Reaction_141 = krecycle*M_LNPp_endo_Arterial
Reaction_142 = krecycle_endo*M_LNP_PO_mac
Reaction_143 = krecycle*M_LNPp_endo_PO
Reaction_144 = krecycle_endo*M_LNP_OO_mac
Reaction_145 = krecycle*M_LNPp_endo_OO
Reaction_146 = krecycle_endo*M_LNP_LN_mac
Reaction_147 = krecycle*M_LNPp_endo_LN
Reaction_79 = Total_Hep_UGT
Reaction_82 = Total_Hep_mRNA

## Sheet: Parameters
Name	Scope	Value
Vol_Venous	mPBPK_LNP_CN_Rat_Juvenile	0.0027018
Vol_Venous_mac	mPBPK_LNP_CN_Rat_Juvenile	5.4e-05
kup	mPBPK_LNP_CN_Rat_Juvenile	0.9063
Vol_Lung_vascular	mPBPK_LNP_CN_Rat_Juvenile	6.88e-05
Vol_Lung_interstitial	mPBPK_LNP_CN_Rat_Juvenile	7.84e-05
Vol_Lung_mac	mPBPK_LNP_CN_Rat_Juvenile	8.47e-06
Jin_Lung	mPBPK_LNP_CN_Rat_Juvenile	0.001
Vol_Arterial	mPBPK_LNP_CN_Rat_Juvenile	0.000675
Vol_Arterial_mac	mPBPK_LNP_CN_Rat_Juvenile	1.35e-05
Vol_PO_vascular	mPBPK_LNP_CN_Rat_Juvenile	0.0001535
Vol_PO_interstitial	mPBPK_LNP_CN_Rat_Juvenile	0.0006244
Vol_PO_mac	mPBPK_LNP_CN_Rat_Juvenile	0.000225
Jin_PO	mPBPK_LNP_CN_Rat_Juvenile	0.001
Vol_Liver_vascular	mPBPK_LNP_CN_Rat_Juvenile	0.000399
Vol_Liver_Kupffer	mPBPK_LNP_CN_Rat_Juvenile	0.000319
Vol_Liver_interstitial	mPBPK_LNP_CN_Rat_Juvenile	0.000763
Vol_Liver_Hep	mPBPK_LNP_CN_Rat_Juvenile	0.00239
Jin_Liver	mPBPK_LNP_CN_Rat_Juvenile	0.0017
Vol_OO_vascular	mPBPK_LNP_CN_Rat_Juvenile	0.001747
Vol_OO_interstitial	mPBPK_LNP_CN_Rat_Juvenile	0.01306
Vol_OO_mac	mPBPK_LNP_CN_Rat_Juvenile	0.001376
Jin_OO	mPBPK_LNP_CN_Rat_Juvenile	0.001
Vol_LN	mPBPK_LNP_CN_Rat_Juvenile	0.0003429
Vol_LN_mac	mPBPK_LNP_CN_Rat_Juvenile	1.37e-05
Q_Lung	mPBPK_LNP_CN_Rat_Juvenile	1.18845
L_Lung	mPBPK_LNP_CN_Rat_Juvenile	0.002377
Q_PO	mPBPK_LNP_CN_Rat_Juvenile	0.32219
L_PO	mPBPK_LNP_CN_Rat_Juvenile	0.000644
Q_Liver	mPBPK_LNP_CN_Rat_Juvenile	0.008514
L_Liver	mPBPK_LNP_CN_Rat_Juvenile	1.7e-05
Q_OO	mPBPK_LNP_CN_Rat_Juvenile	0.85104
L_OO	mPBPK_LNP_CN_Rat_Juvenile	0.001702
L_LN	mPBPK_LNP_CN_Rat_Juvenile	0.006779
kescape	mPBPK_LNP_CN_Rat_Juvenile	0.0056
kdeg_Endo	mPBPK_LNP_CN_Rat_Juvenile	1.6486
kdeg_mRNA_Venous	mPBPK_LNP_CN_Rat_Juvenile	0.1232
kdeg_mRNA_Lung	mPBPK_LNP_CN_Rat_Juvenile	0.0385
kdeg_mRNA_Arterial	mPBPK_LNP_CN_Rat_Juvenile	0.0385
kdeg_mRNA_PO	mPBPK_LNP_CN_Rat_Juvenile	0.0385
kdeg_mRNA_OO	mPBPK_LNP_CN_Rat_Juvenile	0.0385
kdeg_mRNA_Hep	mPBPK_LNP_CN_Rat_Juvenile	0.1232
kdeg_mRNA_Kupffer	mPBPK_LNP_CN_Rat_Juvenile	0.0385
kdeg_mRNA_LN	mPBPK_LNP_CN_Rat_Juvenile	0.0385
ktranslate	mPBPK_LNP_CN_Rat_Juvenile	61540
kdeg_UGT	mPBPK_LNP_CN_Rat_Juvenile	0.0189
kon	mPBPK_LNP_CN_Rat_Juvenile	3.6
koff	mPBPK_LNP_CN_Rat_Juvenile	932
kcat	mPBPK_LNP_CN_Rat_Juvenile	3.96
kdeg_Bil_slow	mPBPK_LNP_CN_Rat_Juvenile	0.0126
kdeg_Bil_fast	mPBPK_LNP_CN_Rat_Juvenile	0.31
Vol_Venous_base	mPBPK_LNP_CN_Rat_Juvenile	0.00906
Vol_Venous_mac_base	mPBPK_LNP_CN_Rat_Juvenile	0.0001812
Vol_Lung_vascular_base	mPBPK_LNP_CN_Rat_Juvenile	0.000231
Vol_Lung_interstitial_base	mPBPK_LNP_CN_Rat_Juvenile	0.000263
Vol_Lung_mac_base	mPBPK_LNP_CN_Rat_Juvenile	2.84e-05
Vol_Arterial_base	mPBPK_LNP_CN_Rat_Juvenile	0.002265
Vol_Arterial_mac_base	mPBPK_LNP_CN_Rat_Juvenile	4.53e-05
Vol_PO_vascular_base	mPBPK_LNP_CN_Rat_Juvenile	0.000515
Vol_PO_interstitial_base	mPBPK_LNP_CN_Rat_Juvenile	0.002094
Vol_PO_mac_base	mPBPK_LNP_CN_Rat_Juvenile	0.000755
Vol_OO_vascular_base	mPBPK_LNP_CN_Rat_Juvenile	0.005858
Vol_OO_interstitial_base	mPBPK_LNP_CN_Rat_Juvenile	0.0438
Vol_OO_mac_base	mPBPK_LNP_CN_Rat_Juvenile	0.00461
Vol_Liver_vascular_base	mPBPK_LNP_CN_Rat_Juvenile	0.00134
Vol_Liver_Kupffer_base	mPBPK_LNP_CN_Rat_Juvenile	0.00107
Vol_Liver_interstitial_base	mPBPK_LNP_CN_Rat_Juvenile	0.00256
Vol_Liver_Hep_base	mPBPK_LNP_CN_Rat_Juvenile	0.008025
Vol_LN_base	mPBPK_LNP_CN_Rat_Juvenile	0.00115
Vol_LN_mac_base	mPBPK_LNP_CN_Rat_Juvenile	4.6e-05
SF	mPBPK_LNP_CN_Rat_Juvenile	1
Q_Lung_base	mPBPK_LNP_CN_Rat_Juvenile	2.945
L_Lung_base	mPBPK_LNP_CN_Rat_Juvenile	0.00589
Q_PO_base	mPBPK_LNP_CN_Rat_Juvenile	0.7984
L_PO_base	mPBPK_LNP_CN_Rat_Juvenile	0.0015968
Q_OO_base	mPBPK_LNP_CN_Rat_Juvenile	2.1089
L_OO_base	mPBPK_LNP_CN_Rat_Juvenile	0.0042178
Q_Liver_base	mPBPK_LNP_CN_Rat_Juvenile	0.0211
L_Liver_base	mPBPK_LNP_CN_Rat_Juvenile	4.22e-05
L_LN_base	mPBPK_LNP_CN_Rat_Juvenile	0.00115
BW	mPBPK_LNP_CN_Rat_Juvenile	139
Bil_IC	mPBPK_LNP_CN_Rat_Juvenile	500
ksyn	mPBPK_LNP_CN_Rat_Juvenile	6.4912
krecycle	mPBPK_LNP_CN_Rat_Juvenile	0
kdeg_Endop	mPBPK_LNP_CN_Rat_Juvenile	1.6486
kup_Kupffer	mPBPK_LNP_CN_Rat_Juvenile	0.9063
Jin	mPBPK_LNP_CN_Rat_Juvenile	0.0017
sigma_i	mPBPK_LNP_CN_Rat_Juvenile	0.2
Jinp	mPBPK_LNP_CN_Rat_Juvenile	0
f_p	mPBPK_LNP_CN_Rat_Juvenile	0.05
kupp	mPBPK_LNP_CN_Rat_Juvenile	0
kdeg_LNPp_sys	mPBPK_LNP_CN_Rat_Juvenile	0
krecycle_endo	mPBPK_LNP_CN_Rat_Juvenile	0
krecycle_base	mPBPK_LNP_CN_Rat_Juvenile	5
kup_Liver	mPBPK_LNP_CN_Rat_Juvenile	0.9063
Jinp_Liver	mPBPK_LNP_CN_Rat_Juvenile	0

## Sheet: Compartments
Name	Value
Venous	1
Lung_vascular	1
Lung_interstitial	1
Arterial	1
PO_vascular	1
PO_Interstitial	1
Liver_vascular	1
Liver_Kupffer	1
Liver_interstitial	1
OO_vascular	1
OO_interstitial	1
LN	1
Output	1
Venous_mac	1
Lung_mac	1
Arterial_mac	1
PO_mac	1
Liver_Hep	1
OO_mac	1
LN_mac	1

## Sheet: Reactions
Name	Reaction
Reaction_1	Venous.M_LNP_Venous -> Venous_mac.M_LNP_Venous_mac
Reaction_2	Lung_vascular.M_LNP_Lung_vascular -> Lung_interstitial.M_LNP_Lung_interstitial
Reaction_3	Lung_interstitial.M_LNP_Lung_interstitial -> Lung_mac.M_LNP_Lung_mac
Reaction_4	Arterial.M_LNP_Arterial -> Arterial_mac.M_LNP_Arterial_mac
Reaction_5	PO_vascular.M_LNP_PO_vascular -> PO_Interstitial.M_LNP_PO_interstitial
Reaction_6	PO_Interstitial.M_LNP_PO_interstitial -> PO_mac.M_LNP_PO_mac
Reaction_7	Liver_vascular.M_LNP_Liver_vascular -> Liver_interstitial.M_LNP_Liver_interstitial
Reaction_8	Liver_vascular.M_LNP_Liver_vascular -> Liver_Kupffer.M_LNP_Liver_Kupffer
Reaction_9	Liver_interstitial.M_LNP_Liver_interstitial -> Liver_Hep.M_LNP_Liver_Hep
Reaction_10	OO_vascular.M_LNP_OO_vascular -> OO_interstitial.M_LNP_OO_interstitial
Reaction_11	OO_interstitial.M_LNP_OO_interstitial -> OO_mac.M_LNP_OO_mac
Reaction_12	Venous.M_LNP_Venous -> Lung_vascular.M_LNP_Lung_vascular
Reaction_13	Lung_interstitial.M_LNP_Lung_interstitial -> LN.M_LNP_LN
Reaction_14	Lung_vascular.M_LNP_Lung_vascular -> Arterial.M_LNP_Arterial
Reaction_15	Arterial.M_LNP_Arterial -> PO_vascular.M_LNP_PO_vascular
Reaction_16	PO_Interstitial.M_LNP_PO_interstitial -> LN.M_LNP_LN
Reaction_17	Arterial.M_LNP_Arterial -> Liver_vascular.M_LNP_Liver_vascular
Reaction_18	Liver_interstitial.M_LNP_Liver_interstitial -> LN.M_LNP_LN
Reaction_19	PO_vascular.M_LNP_PO_vascular -> Liver_vascular.M_LNP_Liver_vascular
Reaction_20	Liver_vascular.M_LNP_Liver_vascular -> Venous.M_LNP_Venous
Reaction_21	Arterial.M_LNP_Arterial -> OO_vascular.M_LNP_OO_vascular
Reaction_22	OO_interstitial.M_LNP_OO_interstitial -> LN.M_LNP_LN
Reaction_23	OO_vascular.M_LNP_OO_vascular -> Venous.M_LNP_Venous
Reaction_24	LN.M_LNP_LN -> LN_mac.M_LNP_LN_mac
Reaction_25	LN.M_LNP_LN -> Venous.M_LNP_Venous
Reaction_26	Venous_mac.M_LNP_Venous_mac -> Venous_mac.M_mRNA_Venous
Reaction_27	Lung_mac.M_LNP_Lung_mac -> Lung_mac.M_mRNA_Lung
Reaction_28	Arterial_mac.M_LNP_Arterial_mac -> Arterial_mac.M_mRNA_Arterial
Reaction_29	PO_mac.M_LNP_PO_mac -> PO_mac.M_mRNA_PO
Reaction_30	OO_mac.M_LNP_OO_mac -> OO_mac.M_mRNA_OO
Reaction_31	Liver_Hep.M_LNP_Liver_Hep -> Liver_Hep.M_mRNA_Hep
Reaction_32	Liver_Kupffer.M_LNP_Liver_Kupffer -> Liver_Kupffer.M_mRNA_Kupffer
Reaction_33	LN_mac.M_LNP_LN_mac -> LN_mac.M_mRNA_LN
Reaction_34	Venous_mac.M_LNP_Venous_mac -> null
Reaction_35	Lung_mac.M_LNP_Lung_mac -> null
Reaction_36	Arterial_mac.M_LNP_Arterial_mac -> null
Reaction_37	PO_mac.M_LNP_PO_mac -> null
Reaction_38	OO_mac.M_LNP_OO_mac -> null
Reaction_39	Liver_Hep.M_LNP_Liver_Hep -> null
Reaction_40	LN_mac.M_LNP_LN_mac -> null
Reaction_41	Venous_mac.M_mRNA_Venous -> null
Reaction_42	Lung_mac.M_mRNA_Lung -> null
Reaction_43	Arterial_mac.M_mRNA_Arterial -> null
Reaction_44	PO_mac.M_mRNA_PO -> null
Reaction_45	OO_mac.M_mRNA_OO -> null
Reaction_46	Liver_Hep.M_mRNA_Hep -> null
Reaction_47	Liver_Kupffer.M_LNP_Liver_Kupffer -> null
Reaction_48	Liver_Kupffer.M_mRNA_Kupffer -> null
Reaction_49	LN_mac.M_mRNA_LN -> null
Reaction_50	Venous_mac.M_mRNA_Venous -> Venous_mac.M_UGT_Venous + Venous_mac.M_mRNA_Venous
Reaction_51	Lung_mac.M_mRNA_Lung -> Lung_mac.M_UGT_Lung + Lung_mac.M_mRNA_Lung
Reaction_52	Arterial_mac.M_mRNA_Arterial -> Arterial_mac.M_UGT_Arterial + Arterial_mac.M_mRNA_Arterial
Reaction_53	PO_mac.M_mRNA_PO -> PO_mac.M_UGT_PO + PO_mac.M_mRNA_PO
Reaction_54	OO_mac.M_mRNA_OO -> OO_mac.M_UGT_OO + OO_mac.M_mRNA_OO
Reaction_55	Liver_Kupffer.M_mRNA_Kupffer -> Liver_Kupffer.M_UGT_Kupffer + Liver_Kupffer.M_mRNA_Kupffer
Reaction_56	Liver_Hep.M_mRNA_Hep -> Liver_Hep.M_UGT_Hep + Liver_Hep.M_mRNA_Hep
Reaction_57	LN_mac.M_mRNA_LN -> LN_mac.M_UGT_LN + LN_mac.M_mRNA_LN
Reaction_58	Venous_mac.M_UGT_Venous -> null
Reaction_59	Lung_mac.M_UGT_Lung -> null
Reaction_60	Arterial_mac.M_UGT_Arterial -> null
Reaction_61	PO_mac.M_UGT_PO -> null
Reaction_62	OO_mac.M_UGT_OO -> null
Reaction_63	Liver_Hep.M_UGT_Hep -> null
Reaction_64	Liver_Kupffer.M_UGT_Kupffer -> null
Reaction_65	LN_mac.M_UGT_LN -> null
Reaction_66	Liver_Hep.M_Bil + Liver_Hep.M_UGT_Hep <-> Liver_Hep.M_UGTbBil
Reaction_67	Liver_Hep.M_UGTbBil -> Liver_Hep.M_BilMG + Liver_Hep.M_UGT_Hep
Reaction_68	Liver_Hep.M_BilMG + Liver_Hep.M_UGT_Hep <-> Liver_Hep.M_UGTbBilMG
Reaction_69	Liver_Hep.M_UGTbBilMG -> Liver_Hep.M_BilDG + Liver_Hep.M_UGT_Hep
Reaction_70	Liver_Hep.M_Bil -> null
Reaction_71	Liver_Hep.M_BilMG -> null
Reaction_72	Liver_Hep.M_BilDG -> null
Reaction_73	null -> Liver_Hep.M_Bil
Reaction_74	Liver_Hep.M_UGTbBil -> Liver_Hep.M_Bil
Reaction_75	Liver_Hep.M_UGTbBilMG -> Liver_Hep.M_BilMG
Reaction_77	Liver_interstitial.M_LNPp_Liver_interstitial -> Liver_Hep.M_LNPp_Hep
Reaction_78	Liver_Hep.M_LNPp_Hep -> Liver_Hep.M_mRNA_Hep
Reaction_80	LN.M_LNPp_LN -> LN_mac.M_LNPp_LN_mac
Reaction_81	LN_mac.M_LNPp_LN_mac -> LN_mac.M_mRNA_LN
Reaction_83	Venous.M_LNPp_Venous -> Venous_mac.M_LNPp_Venous_mac
Reaction_84	Venous_mac.M_LNPp_Venous_mac -> Venous_mac.M_mRNA_Venous
Reaction_86	Lung_interstitial.M_LNPp_Lung_interstitial -> Lung_mac.M_LNPp_Lung_mac
Reaction_87	Lung_mac.M_LNPp_Lung_mac -> Lung_mac.M_mRNA_Lung
Reaction_89	Arterial.M_LNPp_Arterial -> Arterial_mac.M_LNPp_Arterial_mac
Reaction_90	Arterial_mac.M_LNPp_Arterial_mac -> Arterial_mac.M_mRNA_Arterial
Reaction_92	PO_Interstitial.M_LNPp_PO_interstitial -> PO_mac.M_LNPp_PO_mac
Reaction_93	PO_mac.M_LNPp_PO_mac -> PO_mac.M_mRNA_PO
Reaction_95	OO_interstitial.M_LNPp_OO_interstitial -> OO_mac.M_LNPp_OO_mac
Reaction_96	OO_mac.M_LNPp_OO_mac -> OO_mac.M_mRNA_OO
Reaction_97	Liver_interstitial.M_LNPp_Liver_interstitial -> LN.M_LNPp_LN
Reaction_98	LN.M_LNPp_LN -> Venous.M_LNPp_Venous
Reaction_99	Venous.M_LNPp_Venous -> Lung_vascular.M_LNPp_Lung_vascular
Reaction_100	Lung_vascular.M_LNPp_Lung_vascular -> Lung_interstitial.M_LNPp_Lung_interstitial
Reaction_101	Lung_vascular.M_LNPp_Lung_vascular -> Arterial.M_LNPp_Arterial
Reaction_103	Arterial.M_LNPp_Arterial -> PO_vascular.M_LNPp_PO_vascular
Reaction_104	PO_vascular.M_LNPp_PO_vascular -> Liver_vascular.M_LNPp_Liver_vascular
Reaction_105	Liver_vascular.M_LNPp_Liver_vascular -> Liver_interstitial.M_LNPp_Liver_interstitial
Reaction_106	Liver_vascular.M_LNPp_Liver_vascular -> Liver_Kupffer.M_LNPp_Liver_Kupffer
Reaction_107	Liver_Kupffer.M_LNPp_Liver_Kupffer -> Liver_Kupffer.M_mRNA_Kupffer
Reaction_109	Liver_vascular.M_LNPp_Liver_vascular -> Venous.M_LNPp_Venous
Reaction_110	Arterial.M_LNPp_Arterial -> Liver_vascular.M_LNPp_Liver_vascular
Reaction_111	OO_vascular.M_LNPp_OO_vascular -> OO_interstitial.M_LNPp_OO_interstitial
Reaction_112	Arterial.M_LNPp_Arterial -> OO_vascular.M_LNPp_OO_vascular
Reaction_113	OO_vascular.M_LNPp_OO_vascular -> Venous.M_LNPp_Venous
Reaction_114	PO_Interstitial.M_LNPp_PO_interstitial -> LN.M_LNPp_LN
Reaction_115	OO_interstitial.M_LNPp_OO_interstitial -> LN.M_LNPp_LN
Reaction_116	Lung_interstitial.M_LNPp_Lung_interstitial -> LN.M_LNPp_LN
Reaction_117	PO_vascular.M_LNPp_PO_vascular -> PO_Interstitial.M_LNPp_PO_interstitial
Reaction_118	Liver_Hep.M_LNPp_Hep -> null
Reaction_119	Venous_mac.M_LNPp_Venous_mac -> null
Reaction_120	Lung_mac.M_LNPp_Lung_mac -> null
Reaction_121	Arterial_mac.M_LNPp_Arterial_mac -> null
Reaction_122	OO_mac.M_LNPp_OO_mac -> null
Reaction_123	PO_mac.M_LNPp_PO_mac -> null
Reaction_124	Liver_Kupffer.M_LNPp_Liver_Kupffer -> null
Reaction_125	LN_mac.M_LNPp_LN_mac -> null
Reaction_102	Venous.M_LNPp_Venous -> null
Reaction_126	Lung_vascular.M_LNPp_Lung_vascular -> null
Reaction_127	Arterial.M_LNPp_Arterial -> null
Reaction_128	PO_vascular.M_LNPp_PO_vascular -> null
Reaction_129	Liver_vascular.M_LNPp_Liver_vascular -> null
Reaction_130	OO_vascular.M_LNPp_OO_vascular -> null
Reaction_131	LN.M_LNPp_LN -> null
Reaction_76	Liver_Hep.M_LNP_Liver_Hep -> Liver_Hep.M_LNPp_endo_Hep
Reaction_132	Liver_Hep.M_LNPp_endo_Hep -> Liver_interstitial.M_LNPp_Liver_interstitial
Reaction_134	Liver_Kupffer.M_LNP_Liver_Kupffer -> Liver_Kupffer.M_LNPp_endo_Kupffer
Reaction_135	Liver_Kupffer.M_LNPp_endo_Kupffer -> Liver_vascular.M_LNPp_Liver_vascular
Reaction_136	Venous_mac.M_LNP_Venous_mac -> Venous_mac.M_LNPp_endo_Venous
Reaction_137	Venous_mac.M_LNPp_endo_Venous -> Venous.M_LNPp_Venous
Reaction_138	Lung_mac.M_LNP_Lung_mac -> Lung_mac.M_LNPp_endo_Lung
Reaction_139	Lung_mac.M_LNPp_endo_Lung -> Lung_interstitial.M_LNPp_Lung_interstitial
Reaction_140	Arterial_mac.M_LNP_Arterial_mac -> Arterial_mac.M_LNPp_endo_Arterial
Reaction_141	Arterial_mac.M_LNPp_endo_Arterial -> Arterial.M_LNPp_Arterial
Reaction_142	PO_mac.M_LNP_PO_mac -> PO_mac.M_LNPp_endo_PO
Reaction_143	PO_mac.M_LNPp_endo_PO -> PO_Interstitial.M_LNPp_PO_interstitial
Reaction_144	OO_mac.M_LNP_OO_mac -> OO_mac.M_LNPp_endo_OO
Reaction_145	OO_mac.M_LNPp_endo_OO -> OO_interstitial.M_LNPp_OO_interstitial
Reaction_146	LN_mac.M_LNP_LN_mac -> LN_mac.M_LNPp_endo_LN
Reaction_147	LN_mac.M_LNPp_endo_LN -> LN.M_LNPp_LN
Reaction_79	null -> Output.UGT_AUC
Reaction_82	null -> Output.mRNA_AUC

## Sheet: Rules
Rule
C_LNP_Venous = M_LNP_Venous/Vol_Venous
C_LNP_Venous_mac = M_LNP_Venous_mac/Vol_Venous_mac
C_LNP_Lung_vascular = M_LNP_Lung_vascular/Vol_Lung_vascular
C_LNP_Lung_interstitial = M_LNP_Lung_interstitial/Vol_Lung_interstitial
C_LNP_Lung_mac = M_LNP_Lung_mac/Vol_Lung_mac
C_LNP_Arterial = M_LNP_Arterial/Vol_Arterial
C_LNP_Arterial_mac = M_LNP_Arterial_mac/Vol_Arterial_mac
C_LNP_PO_vascular = M_LNP_PO_vascular/Vol_PO_vascular
C_LNP_PO_interstitial = M_LNP_PO_interstitial/Vol_PO_interstitial
C_LNP_PO_mac = M_LNP_PO_mac/Vol_PO_mac
C_LNP_Liver_vascular = M_LNP_Liver_vascular/Vol_Liver_vascular
C_LNP_Liver_Kupffer = M_LNP_Liver_Kupffer/Vol_Liver_Kupffer
C_LNP_Liver_interstitial = M_LNP_Liver_interstitial/Vol_Liver_interstitial
C_LNP_Liver_Hep = M_LNP_Liver_Hep/Vol_Liver_Hep
C_LNP_OO_vascular = M_LNP_OO_vascular/Vol_OO_vascular
C_LNP_OO_interstitial = M_LNP_OO_interstitial/Vol_OO_interstitial
C_LNP_OO_mac = M_LNP_OO_mac/Vol_OO_mac
C_LNP_LN = M_LNP_LN/Vol_LN
C_LNP_LN_mac = M_LNP_LN_mac/Vol_LN_mac
C_mRNA_Venous = M_mRNA_Venous/Vol_Venous_mac
C_mRNA_Lung = M_mRNA_Lung/Vol_Lung_mac
C_mRNA_Arterial = M_mRNA_Arterial/Vol_Arterial_mac
C_mRNA_PO = M_mRNA_PO/Vol_PO_mac
C_mRNA_OO = M_mRNA_OO/Vol_OO_mac
C_mRNA_Hep = M_mRNA_Hep/Vol_Liver_Hep
C_mRNA_Kupffer = M_mRNA_Kupffer/Vol_Liver_Kupffer
C_mRNA_LN = M_mRNA_LN/Vol_LN_mac
Total_Liver_mRNA = (M_LNP_Liver_vascular + M_LNP_Liver_Kupffer + M_mRNA_Kupffer + M_LNP_Liver_interstitial + M_LNP_Liver_Hep + M_mRNA_Hep + M_LNPp_endo_Hep)/(15.7*BW/280)
Plasma_mRNA = M_LNP_Venous + M_LNP_Venous_mac + M_mRNA_Venous + M_LNPp_Venous + M_LNPp_Venous_mac
C_UGT_Venous = M_UGT_Venous/Vol_Venous_mac
C_UGT_Lung = M_UGT_Lung/Vol_Lung_mac
C_UGT_Arterial = M_UGT_Arterial/Vol_Arterial_mac
C_UGT_PO = M_UGT_PO/Vol_PO_mac
C_UGT_OO = M_UGT_OO/Vol_OO_mac
C_UGT_Hep = M_UGT_Hep/Vol_Liver_Hep
C_UGT_Kupffer = M_UGT_Kupffer/Vol_Liver_Kupffer
C_UGT_LN = M_UGT_LN/Vol_LN_mac
C_Bil = M_Bil/Vol_Liver_Hep
C_UGTbBil = M_UGTbBil/Vol_Liver_Hep
C_BilMG = M_BilMG/Vol_Liver_Hep
C_UGTbBilMG = M_UGTbBilMG/Vol_Liver_Hep
C_BilDG = M_BilDG/Vol_Liver_Hep
Total_UGT = M_UGT_Hep + M_UGTbBil + M_UGTbBilMG + M_UGT_Kupffer
Total_Bil = M_Bil + M_UGTbBil + M_BilMG + M_UGTbBilMG + M_BilDG
M_Bil = Bil_IC*0.85
SF = BW/280
Vol_Venous = Vol_Venous_base*SF
Vol_Venous_mac = Vol_Venous_mac_base*SF
Vol_Lung_vascular = Vol_Lung_vascular_base*SF
Vol_Lung_interstitial = Vol_Lung_interstitial_base*SF
Vol_Arterial = Vol_Arterial_base*SF
Vol_Arterial_mac = Vol_Arterial_mac_base*SF
Vol_PO_vascular = Vol_PO_vascular_base*SF
Vol_PO_interstitial = Vol_PO_interstitial_base*SF
Vol_PO_mac = Vol_PO_mac_base*SF
Vol_Lung_mac = Vol_Lung_mac_base*SF
Vol_OO_vascular = Vol_OO_vascular_base*SF
Vol_OO_interstitial = Vol_OO_interstitial_base*SF
Vol_OO_mac = Vol_OO_mac_base*SF
Vol_Liver_vascular = Vol_Liver_vascular_base*SF
Vol_Liver_Kupffer = Vol_Liver_Kupffer_base*SF
Vol_Liver_interstitial = Vol_Liver_interstitial_base*SF
Vol_Liver_Hep = Vol_Liver_Hep_base*SF
Vol_LN = Vol_LN_base*SF
Vol_LN_mac = Vol_LN_mac_base*SF
Q_Lung = Q_Lung_base*SF^0.75
L_Lung = L_Lung_base*SF^0.75
Q_PO = Q_PO_base*SF^0.75
L_PO = L_PO_base*SF^0.75
Q_OO = Q_OO_base*SF^0.75
L_OO = L_OO_base*SF^0.75
Q_Liver = Q_Liver_base*SF^0.75
L_Liver = L_Liver_base*SF^0.75
L_LN = L_LN_base*SF^0.75
Total_iBil = M_Bil + M_UGTbBil
M_BilMG = Bil_IC*0.15
Total_dBil = Total_Bil - Total_iBil
C_LNPp_Liver_interstitial = M_LNPp_Liver_interstitial/Vol_Liver_interstitial
C_LNPp_Hep = M_LNPp_Hep/Vol_Liver_Hep
C_LNPp_LN = M_LNPp_LN/Vol_LN
C_LNPp_LN_mac = M_LNPp_LN_mac/Vol_LN_mac
C_LNPp_Venous = M_LNPp_Venous/Vol_Venous
C_LNPp_Venous_mac = M_LNPp_Venous_mac/Vol_Venous_mac
C_LNPp_Lung_interstitial = M_LNPp_Lung_interstitial/Vol_Lung_interstitial
C_LNPp_Lung_mac = M_LNPp_Lung_mac/Vol_Lung_mac
C_LNPp_Arterial = M_LNPp_Arterial/Vol_Arterial
C_LNPp_Arterial_mac = M_LNPp_Arterial_mac/Vol_Arterial_mac
C_LNPp_PO_interstitial = M_LNPp_PO_interstitial/Vol_PO_interstitial
C_LNPp_PO_mac = M_LNPp_PO_mac/Vol_PO_mac
C_LNPp_OO_interstitial = M_LNPp_OO_interstitial/Vol_OO_interstitial
C_LNPp_OO_mac = M_LNPp_OO_mac/Vol_OO_mac
C_LNPp_PO_vascular = M_LNPp_PO_vascular/Vol_PO_vascular
C_LNPp_Liver_vascular = M_LNPp_Liver_vascular/Vol_Liver_vascular
C_LNPp_Liver_Kupffer = M_LNPp_Liver_Kupffer/Vol_Liver_Kupffer
C_LNPp_OO_vascular = M_LNPp_OO_vascular/Vol_OO_vascular
Jin_Lung = Jin
Jin_OO = Jin
Jin_PO = Jin
Jinp = Jin*f_p
Total_Vascular_LNPp = M_LNPp_Venous + M_LNPp_Lung_vascular + M_LNPp_Arterial + M_LNPp_PO_vascular + M_LNPp_OO_vascular + M_LNPp_Liver_vascular + M_LNPp_LN
C_LNPp_Lung_vascular = M_LNPp_Lung_vascular/Vol_Lung_vascular
C_LNPp_endo_Hep = M_LNPp_endo_Hep/Vol_Liver_Hep
C_LNPp_endo_Kupffer = M_LNPp_endo_Kupffer/Vol_Liver_Kupffer
C_LNPp_endo_Venous = M_LNPp_endo_Venous/Vol_Venous
C_LNPp_endo_Lung = M_LNPp_endo_Lung/Vol_Lung_mac
C_LNPp_endo_Arterial = M_LNPp_endo_Arterial/Vol_Arterial
C_LNPp_endo_PO = M_LNPp_endo_PO/Vol_PO_mac
C_LNPp_endo_OO = M_LNPp_endo_OO/Vol_OO_mac
C_LNPp_endo_LN = M_LNPp_endo_LN/Vol_LN
krecycle = krecycle_base
krecycle_endo = krecycle_base
kupp = kup*f_p
Jinp_Liver = Jin_Liver*f_p
Total_Hep_UGT = M_UGT_Hep + M_UGTbBil + M_UGTbBilMG
kup_Liver = kup
Jin_Liver = Jin
Total_Hep_mRNA = M_LNP_Liver_Hep + M_mRNA_Hep + M_LNPp_Hep
Total_Kupffer_mRNA = M_LNP_Liver_Kupffer + M_mRNA_Kupffer + M_LNPp_Liver_Kupffer
Total_Venousmac_mRNA = M_LNP_Venous_mac + M_LNPp_Venous_mac + M_mRNA_Venous
Total_Lungmac_mRNA = M_LNP_Lung_mac + M_LNPp_Lung_mac + M_mRNA_Lung
Total_Arterialmac_mRNA = M_LNP_Arterial_mac + M_LNPp_Arterial_mac + M_mRNA_Arterial
Total_POmac_mRNA = M_LNP_PO_mac + M_LNPp_PO_mac + M_mRNA_PO
Total_OOmac_mRNA = M_LNP_OO_mac + M_LNPp_OO_mac + M_mRNA_OO
Total_LNmac_mRNA = M_LNP_LN_mac + M_LNPp_LN_mac + M_mRNA_LN
kup_Kupffer = kup
